# Supplementary material for: Red/green-light emission in continuous dielectric phase transition materials: [Me3NVinyl]2[MnX4] (X = Cl, Br)
Source: Royal Society of Chemistry journal article supplement (doi:10.1039/d0ra08795e), 2021-01-01
Supplement: d0ra08795e1.pdf [file d0ra08795e1.pdf]

# Red/Green-light emission in continuous dielectric phase transitions materials: [Me<sub>3</sub>NVinyl]<sub>2</sub>[MnX<sub>4</sub>] (X = Cl, Br)

Yanyan Li,<sup>a</sup> Liting Lin,<sup>a</sup> Jie Yang,<sup>a</sup> and Kun Qian<sup>a,\*</sup>

*a.* College of Pharmacy, Jiangxi University of Traditional Chinese Medicine, Nanchang, 330004, P. R. China, e-mail: qk0876@hotmail.com

## Synthesis of the title complexes

### Synthesis of the complex 1

Trimethylvinyl ammonium chloride (5 mmol, 0.612 g) and manganese chloride (5 mmol, 0.629 g) were dissolved in 12mL methanol solution with stirring. The resultant clear solution was allowed to stand at room temperature. Two days later, green block-shaped crystals of complex **1** were deposited from the solution in approximately 37.5% yield based on Mn. -Anal. calcd. (%) for C<sub>10</sub>H<sub>24</sub>N<sub>2</sub>Cl<sub>4</sub>Mn: C 32.54, H 6.55, N 7.59; found C 32.78, H 8.05, N 7.26. – FT-IR (KBr, cm<sup>-1</sup>): 3450(w), 3110(m), 3026(s), 3000(m), 1660(s), 1462(s), 1412(m), 1248(w), 1070(w), 954(s), 896(s), 710(m).

### Synthesis of the complex 2

Trimethylvinyl ammonium bromine (5 mmol, 0.830 g) and manganese bromide (5 mmol, 1.074 g) were dissolved in 20mL of 40% hydrobromic acid solution with stirring. The resultant clear solution was allowed to place at the temperature 48°C. One week later, orange block-shaped crystals of complex **2** were deposited from the solution in approximately 22.5% yield based on Mn. -Anal. calcd. (%) for C<sub>10</sub>H<sub>24</sub>Br<sub>4</sub>MnN<sub>2</sub>: C 21.96, H 4.42, N 5.12; found C 22.03, H 4.55, N 5.22. – FT-IR (KBr, cm<sup>-1</sup>): 3462(w), 3112(m), 3024(s), 3004(m), 1660(s), 1486(s), 1412(m), 1246(w), 1066(w), 952(s), 894(s), 706(m).

**Figure Captions**

**Fig. S1** Infrared spectrum of solid complex **1** in KBr pellets recorded at room temperature.

**Fig. S2** Infrared spectrum of solid complex **2** in KBr pellets recorded at room temperature.

**Fig. S3** DSC curves of complex **2** obtained in the heating-cooling cycles from 280 to 400 K.

**Fig. S4** Molecular structure diagrams of complex **1** shown at different temperatures. (a) 200K, (b) 303 K, (c) 348 K

**Fig. S5** Hydrogen network diagrams of complex **1** at 200 K

**Fig. S6** Hydrogen network diagrams of complex **1** at 303 K

**Fig. S7** Hydrogen network diagrams of complex **2** at 348 K

**Fig. S8** Molecular structure diagrams of complex **2** shown at different temperatures. (a) 173K, (b) 223K

**Fig. S9** Hydrogen network diagrams of complex **2** at 173 K

**Fig. S10** Hydrogen network diagrams of complex **2** at 223 K

**Fig. S11** The dielectric losses of complex **1** at various frequencies with variation of the temperature.

**Fig. S12** DSC curves of complex **1** obtained in three heating-cooling cycles.

**Fig. S13** DSC curves of complex **2** obtained in three heating-cooling cycles.

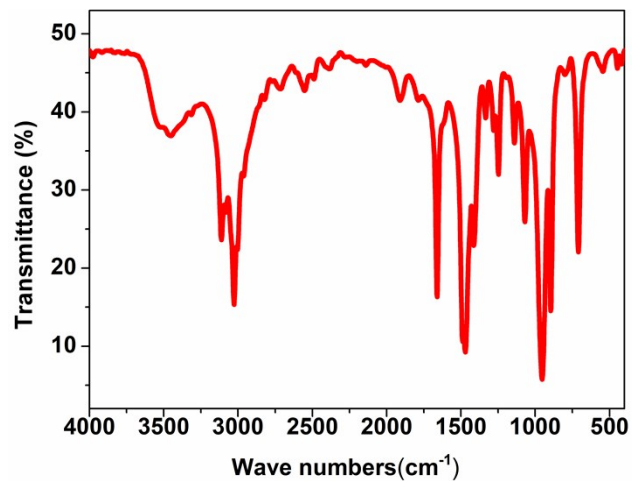

Figure S1

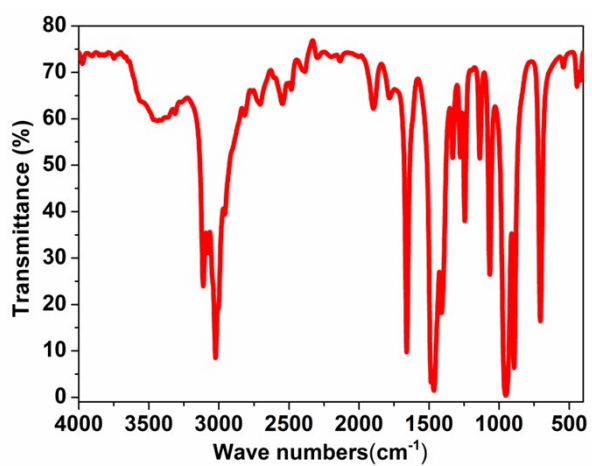

Figure S2

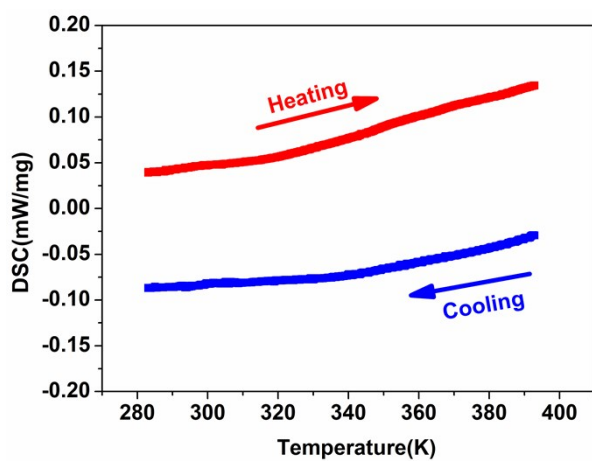

Figure S3

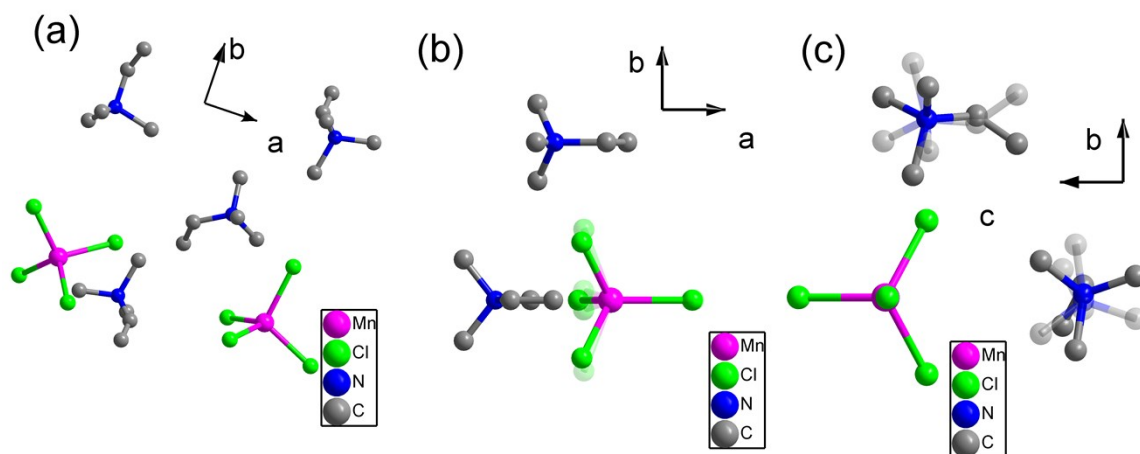

Figure S4

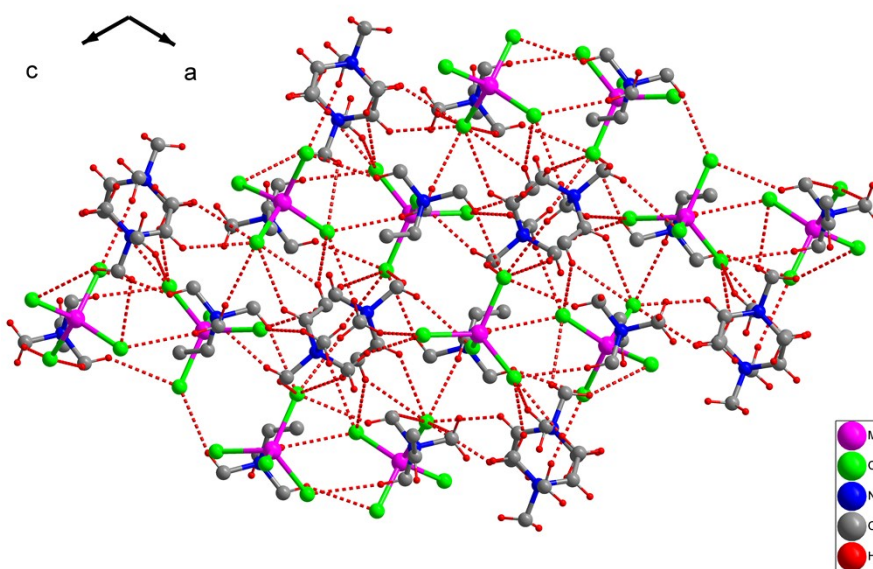

Figure S5

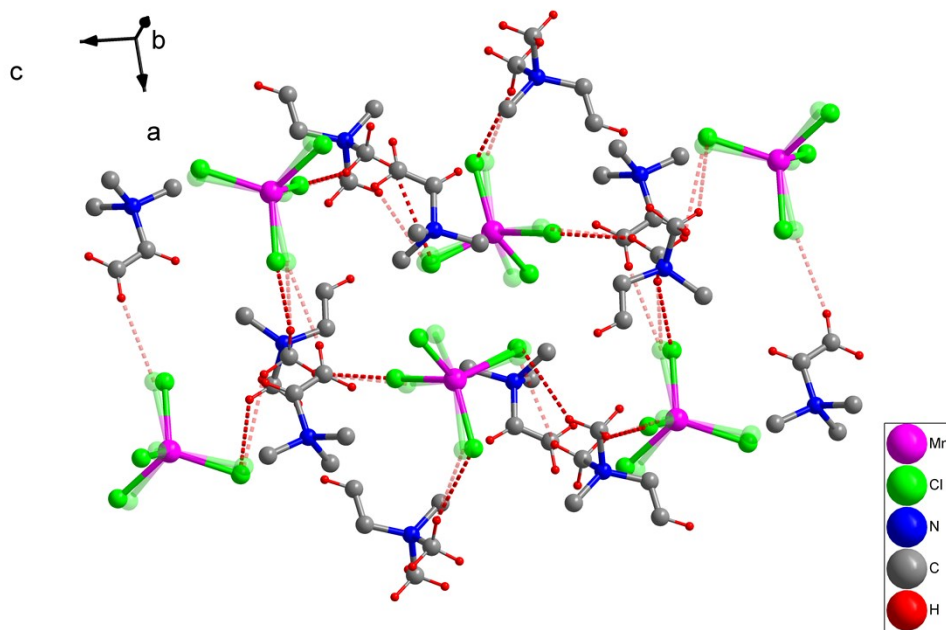

Figure S6

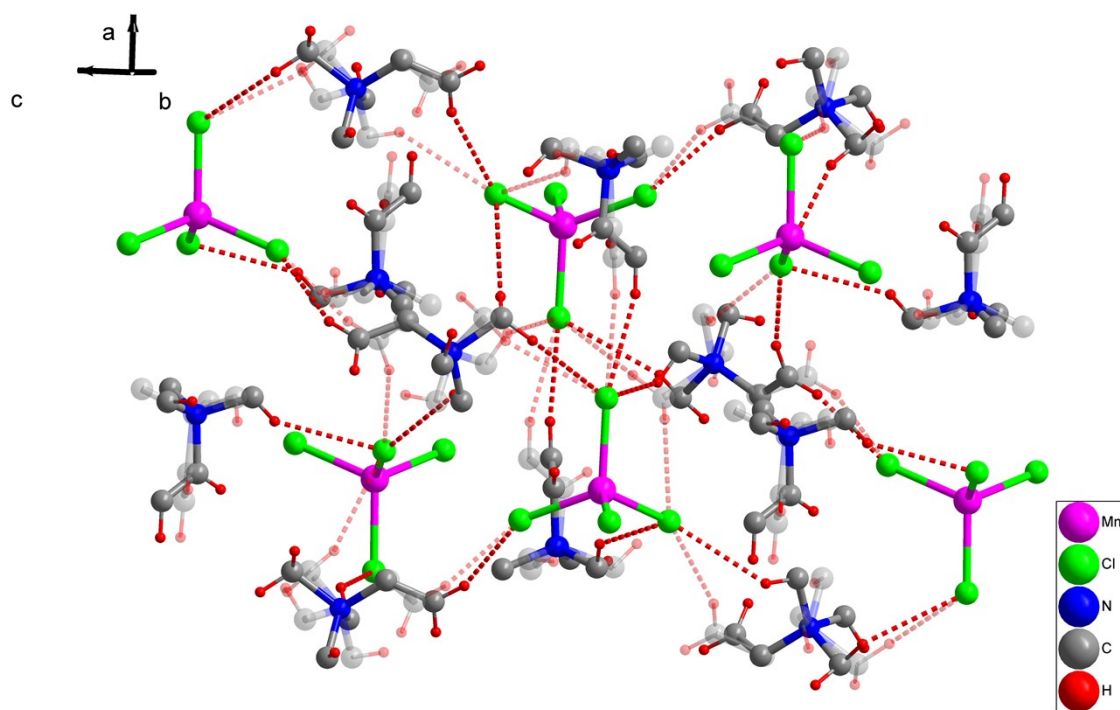

Figure S7

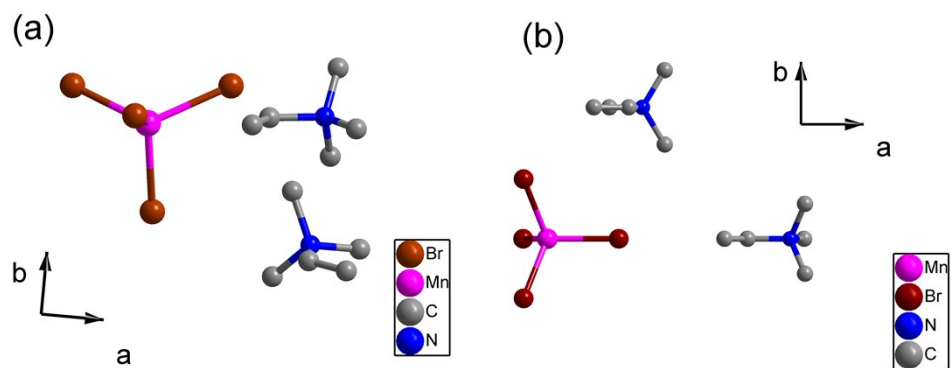

Figure S8

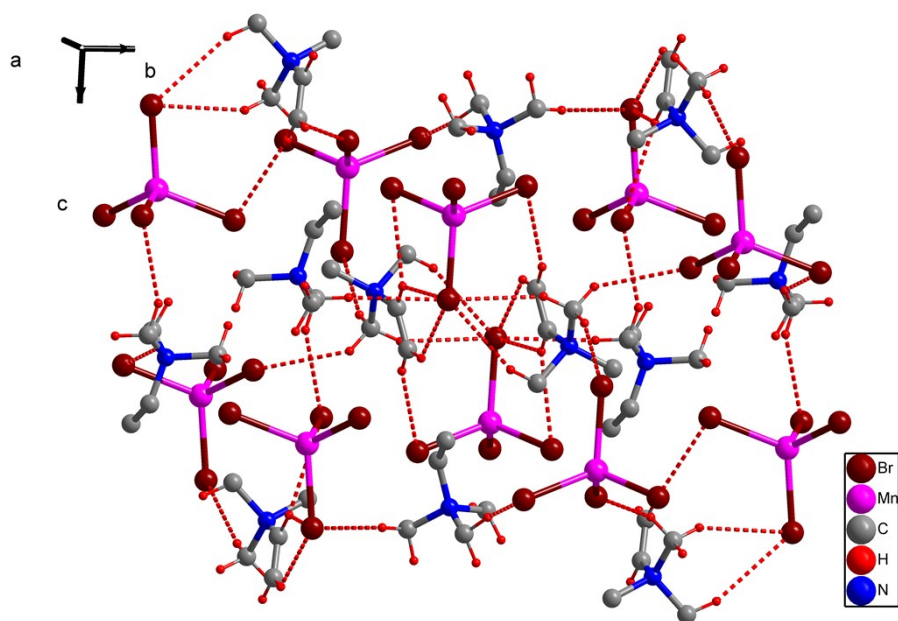

Figure S9

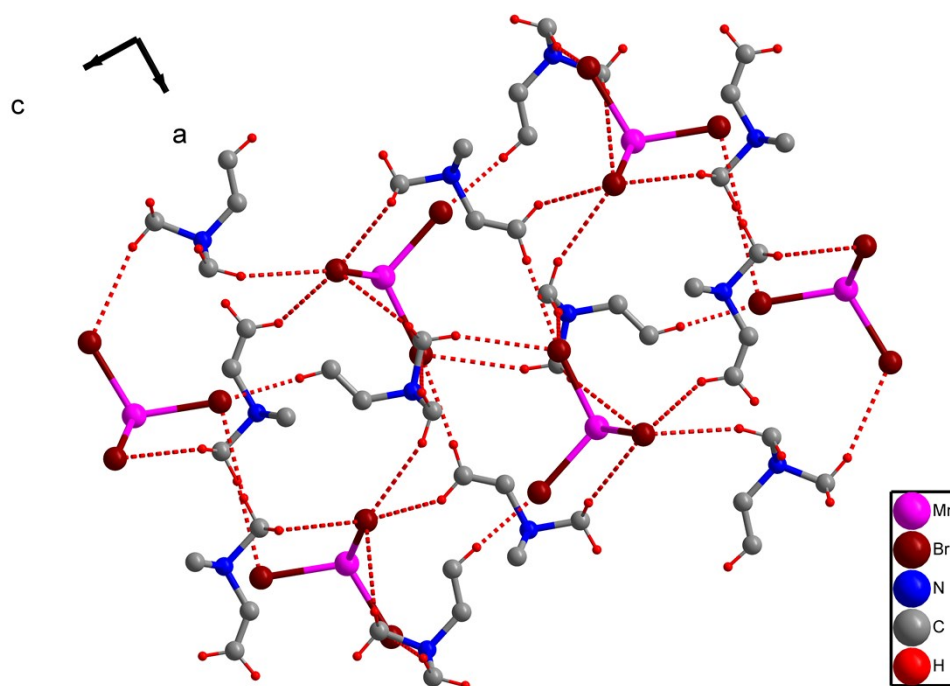

Figure S10

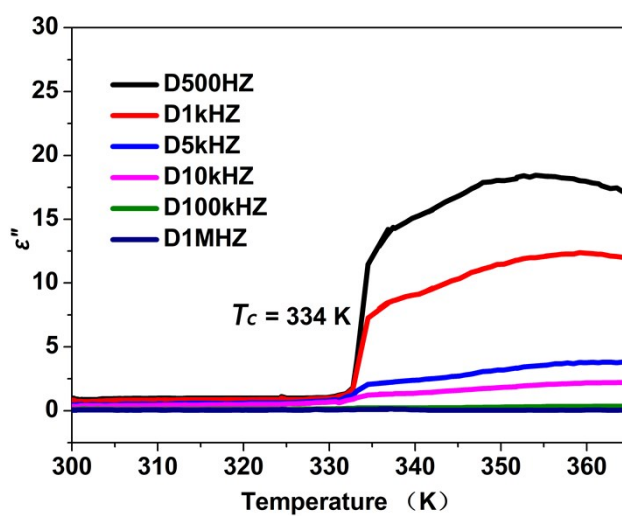

Figure S11



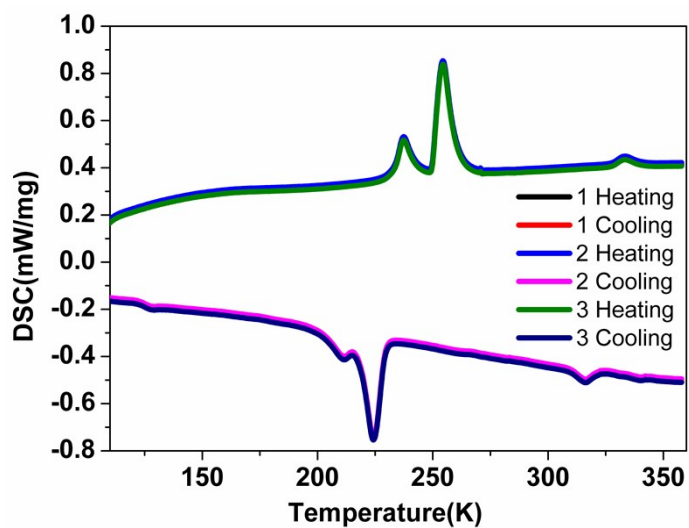

Figure S12

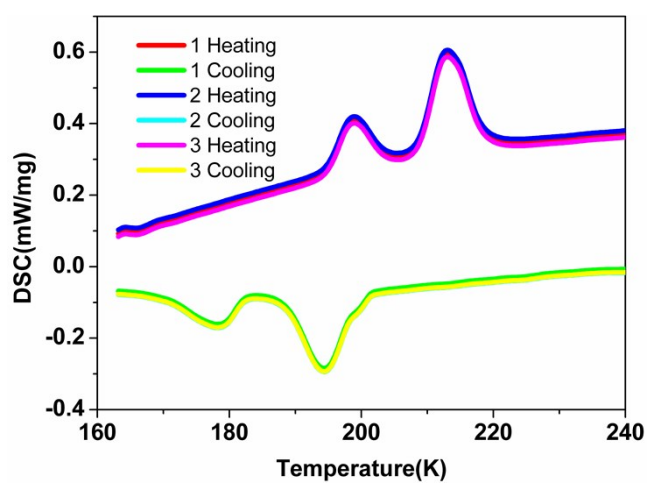

Figure S13

**Table S1.** Summary of crystallographic data for complex **1**

| <b>1</b>                                                                    | $\delta$ phase (200 K)                                            | $\beta$ Phase (303K)                                              | $\alpha$ phase (348K)                                             |
|-----------------------------------------------------------------------------|-------------------------------------------------------------------|-------------------------------------------------------------------|-------------------------------------------------------------------|
| Empirical formula                                                           | C <sub>10</sub> H <sub>24</sub> N <sub>2</sub> Cl <sub>4</sub> Mn | C <sub>10</sub> H <sub>24</sub> N <sub>2</sub> Cl <sub>4</sub> Mn | C <sub>10</sub> H <sub>24</sub> N <sub>2</sub> Cl <sub>4</sub> Mn |
| Formula weight                                                              | 369.05                                                            | 369.05                                                            | 369.06                                                            |
| T, K                                                                        | 200.00(10)                                                        | 303                                                               | 348(2)                                                            |
| Crystal system, space group                                                 | Monoclinic, <i>P2<sub>1</sub>/c</i>                               | Orthorhombic, <i>Pnma</i>                                         | Orthorhombic, <i>Pnma</i>                                         |
| <i>a</i> , Å                                                                | 18.2344(10)                                                       | 13.1299(9)                                                        | 13.1016(14)                                                       |
| <i>b</i> , Å                                                                | 12.6038(4)                                                        | 8.8855(10)                                                        | 9.0403(12)                                                        |
| <i>c</i> , Å                                                                | 18.1345(10)                                                       | 16.1959(14)                                                       | 16.1804(19)                                                       |
| $\beta$ , deg                                                               | 119.224(7)                                                        | 90                                                                | 90                                                                |
| <i>V</i> , Å <sup>3</sup>                                                   | 3637.2(4)                                                         | 1889.5(3)                                                         | 1916.4(4)                                                         |
| <i>Z</i>                                                                    | 8                                                                 | 4                                                                 | 4                                                                 |
| <i>D</i> <sub>calc.</sub> , mg m <sup>-3</sup>                              | 1.348                                                             | 1.297                                                             | 1.283                                                             |
| $\mu$ , mm <sup>-1</sup>                                                    | 11.178                                                            | 1.249                                                             | 1.232                                                             |
| <i>F</i> (000), e                                                           | 1528.0                                                            | 764.0                                                             | 768.0                                                             |
| $2\theta$ range, deg                                                        | 5.554 → 154.514                                                   | 3.994 → 50.994                                                    | 4 → 60.202                                                        |
| <i>hkl</i> range                                                            | -22 ≤ <i>h</i> ≤ 22<br>-15 ≤ <i>k</i> ≤ 15<br>-22 ≤ <i>l</i> ≤ 22 | -15 ≤ <i>h</i> ≤ 15<br>-9 ≤ <i>k</i> ≤ 10<br>-19 ≤ <i>l</i> ≤ 18  | -15 ≤ <i>h</i> ≤ 17<br>-11 ≤ <i>k</i> ≤ 11<br>-20 ≤ <i>l</i> ≤ 20 |
| Data/Restraints/parameters                                                  | 12898/221/320                                                     | 1823/227/121                                                      | 2365/166/139                                                      |
| Reflections collected/unique                                                | 12898 / 12898                                                     | 10208 / 1823                                                      | 10811 / 2365                                                      |
| <i>R</i> <sub>int</sub>                                                     | 0.0326                                                            | 0.0486                                                            | 0.0472                                                            |
| Goodness-of-fit on <i>F</i> <sup>2</sup>                                    | 1.089                                                             | 1.148                                                             | 1.086                                                             |
| <i>R</i> <sub>1</sub> / <i>wR</i> <sub>2</sub> [ <i>I</i> > 2σ( <i>I</i> )] | 0.0655 / 0.1787                                                   | 0.0913 / 0.2426                                                   | 0.0915 / 0.2407                                                   |
| <i>R</i> <sub>1</sub> / <i>wR</i> <sub>2</sub> (all data)                   | 0.0809 / 0.2027                                                   | 0.1323 / 0.2602                                                   | 0.1622 / 0.2765                                                   |
| Largest peak and hole (e Å <sup>-3</sup> )                                  | 0.58/-0.58                                                        | 0.83/-0.66                                                        | 0.55/-0.40                                                        |

**Table S2.** Selected bond lengths and bond angles of complex **1** at 200 K

| Bond lengths | Å         | Bong angles       | deg       |
|--------------|-----------|-------------------|-----------|
| Mn01-Cl03    | 2.370(18) | Cl03-Mn01-Cl06    | 111.10(7) |
| Mn01-Cl06    | 2.375(2)  | Cl09-Mn01-Cl03    | 109.17(8) |
| Mn01-Cl09    | 2.362(18) | Cl09-Mn01-Cl06    | 108.20(8) |
| Mn01-Cl0A    | 2.353(18) | Cl0A-Mn01-Cl03    | 111.57(8) |
| Mn1_5-Cl2_5  | 2.353(19) | Cl0A-Mn01-Cl06    | 107.55(8) |
| Mn1_5-Cl3_5  | 2.361(17) | Cl0A-Mn01-Cl09    | 109.17(9) |
| Mn1_5-Cl4_5  | 2.344(19) | Cl2_5-Mn1_5-Cl3_5 | 107.54(7) |
| Mn1_5-Cl1_5  | 2.358(18) | Cl2_5-Mn1_5-Cl1_5 | 107.99(8) |
| C4_2-C5_2    | 1.299(9)  | Cl4_5-Mn1_5-Cl3_5 | 112.97(9) |
| C4_3-C5_3    | 1.294(8)  | Cl4_5-Mn1_5-Cl3_5 | 109.29(7) |
| C4_1-C5_1    | 1.304(7)  | Cl4_5-Mn1_5-Cl1_5 | 109.12(8) |
| C4_4-C5_4    | 1.281(9)  | Cl1_5-Mn1_5-Cl3_5 | 109.89(8) |

**Table S3.** Selected bond lengths and bond angles of complex **1** at 303 K

| Bond lengths | Å         | Bong angles                | deg       |
|--------------|-----------|----------------------------|-----------|
| Mn1-Cl1      | 2.303(10) | Cl2-Mn1-Cl3                | 107.8(14) |
| Mn1-Cl1A     | 2.342(4)  | Cl1-Mn1-Cl2                | 114.1(15) |
| Mn1-Cl2      | 2.306(10) | Cl1-Mn1-Cl3                | 115.0(15) |
| Mn1-Cl2A     | 2.335(4)  | Cl3A-Mn1-Cl1A              | 112.4(5)  |
| Mn1-Cl3      | 2.311(10) | Cl2A-Mn1-Cl1A              | 107.6(3)  |
| Mn1-Cl3A     | 2.341(5)  | Cl2A-Mn1-Cl3A              | 111.9(4)  |
| C3-C4        | 1.193(9)  | Cl1 <sup>#1</sup> -Mn1-Cl2 | 114.1(15) |
| C7-C8        | 1.209(9)  | Cl1 <sup>#1</sup> -Mn1-Cl3 | 115.0(15) |

Symmetry transformations used to generate equivalent atoms: <sup>#1</sup> +X, -1/2-Y, +Z

**Table S4.** Selected bond lengths and bond angles of complex **1** at 348 K

| Bond lengths | Å        | Bong angles | deg        |
|--------------|----------|-------------|------------|
| Mn1-Cl3      | 2.325(3) | Cl3-Mn1-Cl2 | 111.62(16) |
| Mn1-Cl1      | 2.332(2) | Cl3-Mn1-Cl1 | 108.20(11) |
| Mn1-Cl2      | 2.353(3) | Cl1-Mn1-Cl2 | 107.94(10) |

|           |          |           |          |
|-----------|----------|-----------|----------|
| C4_2-C5_2 | 1.337(9) | C4_1-C5_1 | 1.342(9) |
|-----------|----------|-----------|----------|

**Table S5.** Summary of crystallographic data for complex **2**

| <b>2</b>                                                                             | $\gamma$ phase (173 K)                                            | $\alpha$ phase (223 K)                                            |
|--------------------------------------------------------------------------------------|-------------------------------------------------------------------|-------------------------------------------------------------------|
| Empirical formula                                                                    | C <sub>10</sub> H <sub>24</sub> N <sub>2</sub> Br <sub>4</sub> Mn | C <sub>10</sub> H <sub>24</sub> N <sub>2</sub> Br <sub>4</sub> Mn |
| Formula weight                                                                       | 546.89                                                            | 546.89                                                            |
| <i>T</i> , K                                                                         | 173(2)                                                            | 223(2)                                                            |
| Crystal system, space group                                                          | Monoclinic, <i>P</i> 2 <sub>1</sub> / <i>c</i>                    | Orthorhombic, <i>Pnma</i>                                         |
| <i>a</i> , Å                                                                         | 9.2339(6)                                                         | 13.4500(3)                                                        |
| <i>b</i> , Å                                                                         | 15.1859(10)                                                       | 9.1134(2)                                                         |
| <i>c</i> , Å                                                                         | 13.7409(8)                                                        | 16.4176(5)                                                        |
| $\beta$ , deg                                                                        | 91.494(6)                                                         | 90                                                                |
| <i>V</i> , Å <sup>3</sup>                                                            | 1926.2(2)                                                         | 2012.40(9)                                                        |
| <i>Z</i>                                                                             | 4                                                                 | 4                                                                 |
| <i>D</i> <sub>calc.</sub> , mg m <sup>-3</sup>                                       | 1.886                                                             | 1.805                                                             |
| $\mu$ , mm <sup>-1</sup>                                                             | 8.969                                                             | 14.522                                                            |
| <i>F</i> (000), e                                                                    | 1052                                                              | 1052.0                                                            |
| 2 $\theta$ range, deg                                                                | 3.998 → 50.018                                                    | 8.498 → 153.886                                                   |
| <i>hkl</i> range                                                                     | -10 ≤ <i>h</i> ≤ 10<br>-18 ≤ <i>k</i> ≤ 18<br>-16 ≤ <i>l</i> ≤ 16 | -11 ≤ <i>h</i> ≤ 16<br>-10 ≤ <i>k</i> ≤ 11<br>-20 ≤ <i>l</i> ≤ 20 |
| Data/Restraints/parameters                                                           | 3390 / 0 / 160                                                    | 2135/113/96                                                       |
| Reflections collected/unique                                                         | 15699 / 3390                                                      | 7663 / 2135                                                       |
| <i>R</i> <sub>int</sub>                                                              | 0.1208                                                            | 0.0430                                                            |
| Goodness-of-fit on <i>F</i> <sup>2</sup>                                             | 1.121                                                             | 1.051                                                             |
| <i>R</i> <sub>1</sub> / <i>wR</i> <sub>2</sub> [ <i>I</i> > 2 $\sigma$ ( <i>I</i> )] | 0.1271 / 0.2087                                                   | 0.1182 / 0.2712                                                   |
| <i>R</i> <sub>1</sub> / <i>wR</i> <sub>2</sub> (all data)                            | 0.1680 / 0.2253                                                   | 0.1417 / 0.2835                                                   |
| Largest peak and hole (e Å <sup>-3</sup> )                                           | 1.50 / -0.72                                                      | 1.24/-0.80                                                        |

**Table S6.** Selected bond lengths and angles of complex **2** at 173 K

| Bond lengths | Å        | Bong angles | deg        |
|--------------|----------|-------------|------------|
| Br1-Mn1      | 2.505(3) | Br4-Mn1-Br1 | 118.26(12) |
| Br2-Mn1      | 2.535(3) | Br4-Mn1-Br3 | 105.57(11) |
| Br3-Mn1      | 2.510(3) | Br1-Mn1-Br3 | 107.14(11) |
| Br4-Mn1      | 2.500(3) | Br4-Mn1-Br2 | 106.37(11) |
| C4-C5        | 1.29(3)  | Br1-Mn1-Br2 | 105.50(11) |
| C9-C10       | 1.26(3)  | Br3-Mn1-Br2 | 114.36(12) |

**Table S7.** Selected bond lengths and angles of complex **2** at 223 K

| Bond lengths | Å         | Bong angles                | deg        |
|--------------|-----------|----------------------------|------------|
| Br1-Mn1      | 2.472(2)  | Br1-Mn1-Br2                | 107.50(10) |
| Br3-Mn1      | 2.474(3)  | Br1-Mn1-Br3                | 108.14(9)  |
| Br2-Mn1      | 2.502(4)  | Br3-Mn1-Br2                | 112.05(15) |
| C3-C4        | 1.221(18) | Br1 <sup>#1</sup> -Mn1-Br2 | 107.50(10) |
| C8-C7        | 1.263(17) | Br1 <sup>#1</sup> -Mn1-Br1 | 113.60(15) |

Symmetry transformations used to generate equivalent atoms: <sup>#1</sup> +X, 1/2-Y, +Z
